# Supplementary material
Source: PubMed Central journal article supplement (PMC5118479)
Supplement: ASN.2015091014SupplementaryData.pdf [file ASN.2015091014SupplementaryData.pdf]

**Supplemental Table 1:** List of the 570 genes with conserved Stat3 binding sites (CBS) in at least four species differentially expressed between C56BL/6 and FVB/N remnant kidneys 60 days after nephron reduction.

| Gene Symbol  | Ratio | CBS in      | Name                                                                                                  |
|--------------|-------|-------------|-------------------------------------------------------------------------------------------------------|
| Abhd1        | 27.86 | 5 species   | abhydrolase domain containing 1                                                                       |
| Pi4k2b       | 19.99 | 4 species   | phosphatidylinositol 4-kinase type 2 beta                                                             |
| Pik3c2g      | 11.64 | 4 species   | phosphoinositide-3-kinase, class 2, gamma polypeptide                                                 |
| Snap91       | 11.31 | 4 species   | synaptosomal-associated protein, 91kDa homolog (mouse)                                                |
| Ocell1       | 10.58 | ≥ 6 species | occludin/ELL domain containing 1                                                                      |
| Slc34a2      | 8.86  | 4 species   | solute carrier family 34 (sodium phosphate), member 2                                                 |
| Psmc3ip      | 8.68  | ≥ 6 species | PSMC3 interacting protein                                                                             |
| Hddc3        | 7.17  | ≥ 6 species | HD domain containing 3                                                                                |
| Lcn2         | 6.52  | 4 species   | lipocalin 2                                                                                           |
| Pea15a       | 5.09  | 5 species   | phosphoprotein enriched in astrocytes 15                                                              |
| Gfr1         | 5.09  | 4 species   | GDNF family receptor alpha 1                                                                          |
| H2-DMb2      | 4.94  | 4 species   | major histocompatibility complex, class II, DM beta                                                   |
| Atf3         | 4.88  | 4 species   | activating transcription factor 3                                                                     |
| Wdfy1        | 4.85  | 4 species   | WD repeat and FYVE domain containing 1                                                                |
| Serpina10    | 4.73  | 4 species   | serpin peptidase inhibitor, clade A (alpha-1 antiproteinase, antitrypsin), member 10                  |
| Pm20d1       | 4.71  | 4 species   | peptidase M20 domain containing 1                                                                     |
| Aldh4a1      | 4.35  | 4 species   | aldehyde dehydrogenase 4 family, member A1                                                            |
| Wasf2        | 4.10  | 4 species   | WAS protein family, member 2                                                                          |
| Edn1         | 4.07  | 4 species   | endothelin 1                                                                                          |
| Zkscan1      | 3.98  | 4 species   | zinc finger with KRAB and SCAN domains 1                                                              |
| Cyr61        | 3.94  | 4 species   | cysteine-rich, angiogenic inducer, 61                                                                 |
| Adamts1      | 3.76  | 5 species   | ADAM metalloproteinase with thrombospondin type 1 motif, 1                                            |
| Fst          | 3.70  | ≥ 6 species | folliculin                                                                                            |
| Egr2         | 3.63  | 4 species   | early growth response 2 (Krox-20 homolog, Drosophila)                                                 |
| Cep55        | 3.56  | 4 species   | centrosomal protein 55kDa                                                                             |
| Aspm         | 3.43  | 4 species   | asp (abnormal spindle) homolog, microcephaly associated (Drosophila)                                  |
| 671322       | 3.43  | 4 species   | chromosome 4 open reading frame 33                                                                    |
| Itga1        | 3.34  | 4 species   | integrin, alpha 1                                                                                     |
| Sik1         | 3.28  | ≥ 6 species | SNF1-like kinase                                                                                      |
| Timp1        | 3.27  | 4 species   | TIMP metalloproteinase inhibitor 1                                                                    |
| Ctps         | 3.24  | 4 species   | CTP synthase                                                                                          |
| Lrg1         | 3.18  | 4 species   | leucine-rich alpha-2-glycoprotein 1                                                                   |
| Il17rb       | 3.15  | 4 species   | interleukin 17 receptor B                                                                             |
| Ubt2         | 3.12  | 4 species   | ubiquitin domain containing 2                                                                         |
| Rcan1        | 3.05  | 4 species   | regulator of calcineurin 1                                                                            |
| Socs3        | 3.03  | 4 species   | suppressor of cytokine signaling 3                                                                    |
| Egr1         | 3.00  | 4 species   | early growth response 1                                                                               |
| Anxa4        | 2.99  | 4 species   | annexin A4                                                                                            |
| Col12a1      | 2.98  | 4 species   | collagen, type XII, alpha 1                                                                           |
| Ammecr1      | 2.96  | 4 species   | Alport syndrome, mental retardation, midface hypoplasia and elliptocytosis chromosomal region, gene 1 |
| Tlr2         | 2.91  | 4 species   | toll-like receptor 2                                                                                  |
| Rrm2         | 2.91  | 5 species   | ribonucleotide reductase M2 polypeptide                                                               |
| Ccl2         | 2.88  | 4 species   | chemokine (C-C motif) ligand 13                                                                       |
| Bcl3         | 2.88  | 4 species   | B-cell CLL/lymphoma 3                                                                                 |
| Rragd        | 2.87  | 4 species   | Ras-related GTP binding D                                                                             |
| Cygb         | 2.84  | 4 species   | cytoglobin                                                                                            |
| Tgm1         | 2.80  | 4 species   | transglutaminase 1 (K polypeptide epidermal type I, protein-glutamine-gamma-glutamyltransferase)      |
| LOC100045442 | 2.79  | 4 species   | stromal antigen 1                                                                                     |
| Prc1         | 2.78  | 5 species   | protein regulator of cytokinesis 1                                                                    |
| Fgg          | 2.73  | 4 species   | fibrinogen gamma chain                                                                                |
| Cdca8        | 2.73  | 4 species   | cell division cycle associated 8                                                                      |
| Fos          | 2.70  | 4 species   | v-fos FBJ murine osteosarcoma viral oncogene homolog                                                  |
| Zwilch       | 2.69  | 4 species   | Zwilch, kinetochore associated, homolog (Drosophila)                                                  |
| LOC636537    | 2.63  | 4 species   | signal sequence receptor, alpha (translocon-associated protein alpha)                                 |
| Aldh1a2      | 2.61  | 4 species   | aldehyde dehydrogenase 1 family, member A2                                                            |
| Myc          | 2.58  | 4 species   | v-myc myelocytomatosis viral oncogene homolog (avian)                                                 |
| Tmem82       | 2.57  | 4 species   | transmembrane protein 82                                                                              |
| Egr3         | 2.53  | 4 species   | early growth response 3                                                                               |
| Adal         | 2.52  | 4 species   | adenosine deaminase-like                                                                              |
| Hpcal4       | 2.52  | ≥ 6 species | hippocalcin like 4                                                                                    |
| Ccna2        | 2.51  | 4 species   | cyclin A2                                                                                             |
| Lgi2         | 2.49  | 4 species   | leucine-rich repeat LGI family, member 2                                                              |
| Cks1b        | 2.48  | 4 species   | CDC28 protein kinase regulatory subunit 1B                                                            |

|                    |      |             |                                                                                                  |
|--------------------|------|-------------|--------------------------------------------------------------------------------------------------|
| F3                 | 2.47 | 4 species   | coagulation factor III (thromboplastin, tissue factor)                                           |
| Abcc9              | 2.45 | 4 species   | ATP-binding cassette, sub-family C (CFTR/MRP), member 9                                          |
| Tgfb2              | 2.43 | 4 species   | transforming growth factor, beta 2                                                               |
| Tgif1              | 2.41 | 4 species   | TGFB-induced factor homeobox 1                                                                   |
| Gm71               | 2.40 | 4 species   | gene model 71. (NCBI)                                                                            |
| Slc40a1            | 2.39 | ≥ 6 species | solute carrier family 40 (iron-regulated transporter), member 1                                  |
| Steap1             | 2.39 | 4 species   | six transmembrane epithelial antigen of the prostate 1                                           |
| LOC100046232       | 2.37 | 4 species   | nuclear factor, interleukin 3 regulated                                                          |
| Socs2              | 2.36 | 5 species   | suppressor of cytokine signaling 2                                                               |
| Rpl12              | 2.35 | 4 species   | small nucleolar RNA, H/ACA box 65                                                                |
| Nr4a1              | 2.35 | 5 species   | nuclear receptor subfamily 4, group A, member 1                                                  |
| Uchl1              | 2.32 | 4 species   | ubiquitin carboxyl-terminal esterase L1 (ubiquitin thiolesterase)                                |
| Csf1               | 2.31 | 4 species   | colony stimulating factor 1 (macrophage)                                                         |
| Cnot7              | 2.30 | 5 species   | CCR4-NOT transcription complex, subunit 7                                                        |
| Ccnl2              | 2.30 | ≥ 6 species | cyclin L2                                                                                        |
| Cxcr4              | 2.29 | 4 species   | chemokine (C-X-C motif) receptor 4                                                               |
| Med1               | 2.29 | 4 species   | mediator complex subunit 1                                                                       |
| LOC100045677       | 2.27 | 4 species   | minichromosome maintenance complex component 3                                                   |
| Pck1               | 2.25 | ≥ 6 species | phosphoenolpyruvate carboxykinase 1 (soluble)                                                    |
| Ptrh1              | 2.24 | 4 species   | peptidyl-tRNA hydrolase 1 homolog (S. cerevisiae)                                                |
| Id1                | 2.24 | 4 species   | inhibitor of DNA binding 1, dominant negative helix-loop-helix protein                           |
| Josd1              | 2.23 | ≥ 6 species | Josephin domain containing 1                                                                     |
| Aff2               | 2.23 | 4 species   | ---                                                                                              |
| Clcf1              | 2.23 | 4 species   | cardiotrophin-like cytokine factor 1                                                             |
| Tpm3               | 2.21 | 4 species   | tropomyosin 3                                                                                    |
| Ctgf               | 2.21 | 4 species   | connective tissue growth factor                                                                  |
| Il6st              | 2.19 | 5 species   | interleukin 6 signal transducer (gp130, oncostatin M receptor)                                   |
| Olfm4              | 2.16 | 4 species   | olfactomedin 4                                                                                   |
| Dpysl3             | 2.16 | 4 species   | dihydropyrimidinase-like 3                                                                       |
| Icam1              | 2.16 | 5 species   | intercellular adhesion molecule 1 (CD54), human rhinovirus receptor                              |
| Mthfd2             | 2.16 | 4 species   | methylenetetrahydrofolate dehydrogenase (NADP+ dependent) 2.                                     |
| 1300014I06Rik      | 2.15 | 4 species   | methenyltetrahydrofolate cyclohydrolase                                                          |
| Gart               | 2.15 | 4 species   | chromosome 6 open reading frame 145                                                              |
| Zfp185             | 2.14 | 4 species   | phosphoribosylglycinamide formyltransferase, phosphoribosylglycinamide synthetase,               |
| Myo1c              | 2.14 | 5 species   | phosphoribosylaminoimidazole synthetase                                                          |
| OTTMUSG00000007332 | 2.14 | 4 species   | zinc finger protein 185 (LIM domain)                                                             |
| Frg1               | 2.14 | 4 species   | myosin IC                                                                                        |
| Plek               | 2.13 | 4 species   | sushi domain containing 1                                                                        |
| Adm                | 2.11 | 4 species   | FSHD region gene 1                                                                               |
| Tsr1               | 2.11 | 4 species   | pleckstrin                                                                                       |
| Net1               | 2.09 | 4 species   | adrenomedullin                                                                                   |
| Ywhah              | 2.09 | 4 species   | TSR1, 20S rRNA accumulation, homolog (S. cerevisiae)                                             |
| Rhobtb3            | 2.07 | 4 species   | neuroepithelial cell transforming gene 1                                                         |
| Rrad               | 2.07 | 4 species   | tyrosine 3-monooxygenase/tryptophan 5-monooxygenase activation protein, eta                      |
| Denn2a             | 2.07 | 4 species   | polypeptide                                                                                      |
| Btg2               | 2.06 | 4 species   | Rho-related BTB domain containing 3                                                              |
| Slc25a17           | 2.06 | 4 species   | Ras-related associated with diabetes                                                             |
| Kras               | 2.06 | 4 species   | DENN/MADD domain containing 2A                                                                   |
| Parvb              | 2.06 | 4 species   | BTG family, member 2                                                                             |
| Per2               | 2.05 | 4 species   | solute carrier family 25 (mitochondrial carrier; peroxisomal membrane protein, 34kDa), member 17 |
| Plau               | 2.04 | 4 species   | v-Ki-ras2 Kirsten rat sarcoma viral oncogene homolog                                             |
| Gng10              | 2.03 | 4 species   | parvin, beta                                                                                     |
| Jun                | 2.03 | 4 species   | period homolog 2 (Drosophila)                                                                    |
| Crnk1l             | 2.02 | 4 species   | plasminogen activator, urokinase                                                                 |
| Ier2               | 2.01 | 4 species   | guanine nucleotide binding protein (G protein), gamma 10                                         |
| Commd2             | 2.01 | 4 species   | jun oncogene                                                                                     |
| Sec61a1            | 2.00 | 4 species   | crooked neck pre-mRNA splicing factor-like 1 (Drosophila)                                        |
| Dynl1              | 2.00 | 4 species   | immediate early response 2                                                                       |
| Rnase4             | 2.00 | 4 species   | COMM domain containing 2                                                                         |
| Klf6               | 1.99 | 5 species   | Sec61 alpha 1 subunit (S. cerevisiae)                                                            |
| Abca1              | 1.99 | 4 species   | dynein, light chain, LC8-type 1                                                                  |
| P2ry6              | 1.99 | 4 species   | ribonuclease, RNase A family, 4                                                                  |
| Pprc1              | 1.97 | 4 species   | Kruppel-like factor 6                                                                            |
| Shoc2              | 1.97 | ≥ 6 species | ATP-binding cassette, sub-family A (ABC1), member 1                                              |
| Anxa2              | 1.97 | 4 species   | pyrimidineric receptor P2Y, G-protein coupled, 6                                                 |
| Hs6st2             | 1.97 | 4 species   | peroxisome proliferator-activated receptor gamma, coactivator-related 1                          |
| Nfkbie             | 1.97 | 4 species   | soc-2 suppressor of clear homolog (C. elegans)                                                   |
| Tuft1              | 1.96 | 4 species   | annexin A2                                                                                       |
| Trib1              | 1.95 | 4 species   | heparan sulfate 6-O-sulfotransferase 2                                                           |
| Mobkl2a            | 1.95 | 4 species   | nuclear factor of kappa light polypeptide gene enhancer in B-cells inhibitor, epsilon            |
| Mettl6             | 1.95 | 4 species   | tuftelin 1                                                                                       |
|                    |      |             | tribbles homolog 1 (Drosophila)                                                                  |
|                    |      |             | MOB1, Mps One Binder kinase activator-like 2A (yeast)                                            |
|                    |      |             | methyltransferase like 6                                                                         |

|               |      |             |                                                                                           |
|---------------|------|-------------|-------------------------------------------------------------------------------------------|
| Pdlim7        | 1.95 | 4 species   | PDZ and LIM domain 7 (enigma)                                                             |
| Trim47        | 1.95 | 5 species   | tripartite motif-containing 47                                                            |
| Akt1          | 1.94 | 4 species   | v-akt murine thymoma viral oncogene homolog 1                                             |
| Alg12         | 1.94 | 4 species   | asparagine-linked glycosylation 12 homolog (S. cerevisiae, alpha-1,6-mannosyltransferase) |
| Marcks11      | 1.93 | 4 species   | MARCKS-like 1                                                                             |
| 1810013L24Rik | 1.93 | 5 species   | chromosome 16 open reading frame 72                                                       |
| Kpna2         | 1.92 | 5 species   | karyopherin alpha 2 (RAG cohort 1, importin alpha 1)                                      |
| Acy1          | 1.92 | 4 species   | aminoacylase 1                                                                            |
| Fermt3        | 1.92 | 4 species   | fermitin family homolog 3 (Drosophila)                                                    |
| Ier5          | 1.91 | 4 species   | immediate early response 5                                                                |
| Coro1c        | 1.91 | 4 species   | coronin, actin binding protein, 1C                                                        |
| Rgs5          | 1.90 | 4 species   | regulator of G-protein signaling 5                                                        |
| S100a6        | 1.90 | 4 species   | S100 calcium binding protein A6                                                           |
| Sphk1         | 1.89 | 5 species   | sphingosine kinase 1                                                                      |
| Plp2          | 1.89 | 4 species   | proteolipid protein 2 (colonic epithelium-enriched)                                       |
| Nasp          | 1.89 | ≥ 6 species | nuclear autoantigenic sperm protein (histone-binding)                                     |
| Mcm4          | 1.88 | 4 species   | minichromosome maintenance complex component 4                                            |
| Plekho1       | 1.88 | 4 species   | pleckstrin homology domain containing, family O member 1                                  |
| Mad212        | 1.88 | 4 species   | MAD2 mitotic arrest deficient-like 2 (yeast)                                              |
| Smc2          | 1.87 | 4 species   | structural maintenance of chromosomes 2                                                   |
| Creld2        | 1.87 | 4 species   | cysteine-rich with EGF-like domains 2                                                     |
| Gtf2f2        | 1.87 | 4 species   | general transcription factor IIF, polypeptide 2, 30kDa                                    |
| Tifa          | 1.86 | 4 species   | TRAF-interacting protein with a forkhead-associated domain                                |
| H2afx         | 1.86 | 4 species   | H2A histone family, member X                                                              |
| Psmb10        | 1.86 | 5 species   | proteasome (prosome, macropain) subunit, beta type, 10                                    |
| C1qa          | 1.86 | 4 species   | complement component 1, q subcomponent, A chain                                           |
| Cxcl12        | 1.86 | 4 species   | chemokine (C-X-C motif) ligand 12 (stromal cell-derived factor 1)                         |
| Wdr1          | 1.86 | 4 species   | WD repeat domain 1                                                                        |
| Samd14        | 1.85 | 4 species   | sterile alpha motif domain containing 14                                                  |
| Ddit4         | 1.85 | 4 species   | DNA-damage-inducible transcript 4                                                         |
| Tap2          | 1.85 | 4 species   | transporter 2, ATP-binding cassette, sub-family B (MDR/TAP)                               |
| Hspa5         | 1.84 | 4 species   | heat shock 70kDa protein 5 (glucose-regulated protein, 78kDa)                             |
| Actn1         | 1.84 | 4 species   | actinin, alpha 1                                                                          |
| Fbxw9         | 1.84 | 4 species   | F-box and WD repeat domain containing 9                                                   |
| Kpna3         | 1.84 | 4 species   | karyopherin alpha 3 (importin alpha 4)                                                    |
| Cenpt         | 1.84 | 4 species   | centromere protein T                                                                      |
| 5730559C18Rik | 1.84 | 4 species   | chromosome 1 open reading frame 106                                                       |
| Gas5          | 1.83 | 4 species   | growth arrest-specific 5                                                                  |
| Arih2         | 1.83 | 4 species   | ariadne homolog 2 (Drosophila)                                                            |
| Fen1          | 1.83 | 5 species   | flap structure-specific endonuclease 1                                                    |
| Tsc22d3       | 1.82 | 4 species   | TSC22 domain family, member 3                                                             |
| Cep76         | 1.82 | ≥ 6 species | centrosomal protein 76kDa                                                                 |
| Fbxo4         | 1.82 | 4 species   | F-box protein 4                                                                           |
| Laptm5        | 1.82 | 4 species   | lysosomal associated multispinning membrane protein 5                                     |
| Hivep2        | 1.82 | ≥ 6 species | human immunodeficiency virus type I enhancer binding protein 2                            |
| Gadd45a       | 1.81 | 4 species   | growth arrest and DNA-damage-inducible, alpha                                             |
| Arf6          | 1.81 | 4 species   | ADP-ribosylation factor 6                                                                 |
| Tmed2         | 1.80 | 4 species   | transmembrane emp24 domain trafficking protein 2                                          |
| Tpm1          | 1.80 | 4 species   | tropomyosin 1 (alpha)                                                                     |
| Pstpip2       | 1.80 | 5 species   | proline-serine-threonine phosphatase interacting protein 2                                |
| Clcn2         | 1.79 | 4 species   | chloride channel 2                                                                        |
| LOC100046704  | 1.78 | 4 species   | neuroblastoma RAS viral (v-ras) oncogene homolog                                          |
| Efh2          | 1.78 | 4 species   | EF-hand domain family, member D2                                                          |
| Mcm7          | 1.78 | 5 species   | minichromosome maintenance complex component 7                                            |
| Lmna          | 1.78 | 4 species   | lamin A/C                                                                                 |
| Fn1           | 1.77 | 4 species   | fibronectin 1                                                                             |
| Ctbs          | 1.77 | 4 species   | chitinase, di-N-acetyl-                                                                   |
| Rras          | 1.77 | 4 species   | related RAS viral (r-ras) oncogene homolog                                                |
| Mobk11b       | 1.76 | 4 species   | MOB1, Mps One Binder kinase activator-like 1B (yeast)                                     |
| Ubr1          | 1.76 | 4 species   | ubiquitin protein ligase E3 component n-recogin 1                                         |
| Gdpd1         | 1.76 | 5 species   | glycerophosphodiester phosphodiesterase domain containing 1                               |
| Gla           | 1.76 | 4 species   | galactosidase, alpha                                                                      |
| Rrm1          | 1.75 | 4 species   | ribonucleotide reductase M1 polypeptide                                                   |
| Unc5b         | 1.75 | 4 species   | unc-5 homolog B (C. elegans)                                                              |
| Trps1         | 1.74 | ≥ 6 species | trichorhinophalangeal syndrome 1                                                          |
| Gch1          | 1.74 | 4 species   | GTP cyclohydrolase 1 (dopa-responsive dystonia)                                           |
| Mrpl19        | 1.74 | 5 species   | mitochondrial ribosomal protein L19                                                       |
| Xbp1          | 1.74 | 4 species   | X-box binding protein 1                                                                   |
| Fytd1         | 1.74 | 4 species   | forty-two-three domain containing 1                                                       |
| Nup12         | 1.74 | 4 species   | nucleoporin like 2                                                                        |
| Ica1          | 1.73 | 4 species   | islet cell autoantigen 1, 69kDa                                                           |
| Ttc19         | 1.73 | 4 species   | tetratricopeptide repeat domain 19                                                        |
| Mvp           | 1.73 | 4 species   | major vault protein                                                                       |
| Ptpn2         | 1.73 | 5 species   | protein tyrosine phosphatase, non-receptor type 2                                         |

|               |      |             |                                                                                                   |
|---------------|------|-------------|---------------------------------------------------------------------------------------------------|
| S100a4        | 1.73 | 4 species   | S100 calcium binding protein A4                                                                   |
| Tuba1a        | 1.73 | 4 species   | tubulin, alpha 1a                                                                                 |
| 1110034A24Rik | 1.73 | ≥ 6 species | chromosome 14 open reading frame 104                                                              |
| Tmed5         | 1.72 | 5 species   | transmembrane emp24 protein transport domain containing 5                                         |
| Serping1      | 1.71 | 5 species   | serpin peptidase inhibitor, clade G (C1 inhibitor), member 1, (angioedema, hereditary)            |
| Dusp14        | 1.71 | 4 species   | dual specificity phosphatase 14                                                                   |
| Gmppb         | 1.71 | 4 species   | GDP-mannose pyrophosphorylase B                                                                   |
| Impdh2        | 1.71 | 4 species   | IMP (inosine monophosphate) dehydrogenase 2                                                       |
| Tagln2        | 1.71 | 4 species   | transgelin 2                                                                                      |
| Krt8          | 1.70 | 5 species   | ---                                                                                               |
| Farsa         | 1.70 | 4 species   | phenylalanyl-tRNA synthetase, alpha subunit                                                       |
| Il13ra1       | 1.70 | 4 species   | interleukin 13 receptor, alpha 1                                                                  |
| Col4a2        | 1.69 | 4 species   | collagen, type IV, alpha 2                                                                        |
| Runx1         | 1.69 | 4 species   | runt-related transcription factor 1 (acute myeloid leukemia 1; aml1 oncogene)                     |
| Tmod3         | 1.68 | 4 species   | tropomodulin 3 (ubiquitous)                                                                       |
| Hsd17b7       | 1.67 | 5 species   | hydroxysteroid (17-beta) dehydrogenase 7                                                          |
| Ncf1          | 1.67 | 4 species   | neutrophil cytosolic factor 1C pseudogene                                                         |
| Spred1        | 1.67 | 4 species   | sprouty-related, EVH1 domain containing 1                                                         |
| Sdc1          | 1.67 | 4 species   | syndecan 1                                                                                        |
| Tubb2c        | 1.67 | 4 species   | tubulin, beta 2C                                                                                  |
| Traf4         | 1.67 | 5 species   | TNF receptor-associated factor 4                                                                  |
| Apex1         | 1.67 | 4 species   | APEX nuclease (multifunctional DNA repair enzyme) 1                                               |
| Ccr2          | 1.66 | 4 species   | chemokine (C-C motif) receptor 2                                                                  |
| Ngrn          | 1.66 | 5 species   | neugrin, neurite outgrowth associated                                                             |
| 2200002D01Rik | 1.66 | 4 species   | RIKEN cDNA 2200002D01 gene                                                                        |
| Timm9         | 1.66 | ≥ 6 species | translocase of inner mitochondrial membrane 9 homolog (yeast)                                     |
| Nuak2         | 1.66 | ≥ 6 species | NUAK family, SNF1-like kinase, 2                                                                  |
| Msn           | 1.65 | 4 species   | moesin                                                                                            |
| Nubp2         | 1.65 | ≥ 6 species | nucleotide binding protein 2 (MinD homolog, E. coli)                                              |
| Nfkbia        | 1.65 | 5 species   | nuclear factor of kappa light polypeptide gene enhancer in B-cells inhibitor, alpha               |
| A030009H04Rik | 1.64 | 4 species   | hypothetical protein LOC284023                                                                    |
| Rbm12         | 1.64 | 4 species   | RNA binding motif protein 12                                                                      |
| Sfpq          | 1.64 | 5 species   | splicing factor proline/glutamine-rich (polypyrimidine tract binding protein associated)          |
| Nid1          | 1.64 | 4 species   | nidogen 1                                                                                         |
| Ugcg          | 1.64 | 4 species   | UDP-glucose ceramide glucosyltransferase                                                          |
| Gpx7          | 1.63 | 4 species   | glutathione peroxidase 7                                                                          |
| Agt           | 1.63 | 5 species   | angiotensinogen (serpin peptidase inhibitor, clade A, member 8)                                   |
| Tspan5        | 1.63 | 4 species   | tetraspanin 5                                                                                     |
| Tspan4        | 1.63 | 4 species   | tetraspanin 4                                                                                     |
| Tgfb1         | 1.62 | 4 species   | transforming growth factor, beta-induced, 68kDa                                                   |
| Rock2         | 1.62 | 4 species   | Rho-associated, coiled-coil containing protein kinase 2                                           |
| Pcdh7         | 1.62 | 4 species   | protocadherin 7                                                                                   |
| Ppp1r14b      | 1.62 | 4 species   | protein phosphatase 1, regulatory (inhibitor) subunit 14B                                         |
| Utp18         | 1.62 | 5 species   | UTP18, small subunit (SSU) processome component, homolog (yeast)                                  |
| 1600012H06Rik | 1.62 | ≥ 6 species | chromosome 6 open reading frame 120                                                               |
| Prpf31        | 1.62 | 4 species   | PRP31 pre-mRNA processing factor 31 homolog (S. cerevisiae)                                       |
| Osmr          | 1.62 | 4 species   | oncostatin M receptor                                                                             |
| Map4k4        | 1.62 | 4 species   | mitogen-activated protein kinase kinase kinase kinase 4                                           |
| Pgs1          | 1.61 | 4 species   | phosphatidylglycerophosphate synthase 1                                                           |
| Acs15         | 1.61 | 4 species   | acyl-CoA synthetase long-chain family member 5                                                    |
| Ttc14         | 1.61 | ≥ 6 species | tetratricopeptide repeat domain 14                                                                |
| Bzw2          | 1.61 | 5 species   | basic leucine zipper and W2 domains 2                                                             |
| 1600021P15Rik | 1.60 | 4 species   | chromosome 3 open reading frame 59                                                                |
| Rap2a         | 1.60 | 4 species   | RAP2A, member of RAS oncogene family                                                              |
| Cpne8         | 1.60 | 4 species   | copine VIII                                                                                       |
| 1810029B16Rik | 1.60 | 4 species   | hypothetical protein FLJ11184                                                                     |
| Elf3          | 1.60 | 4 species   | E74-like factor 3 (ets domain transcription factor, epithelial-specific )                         |
| Psmg2         | 1.60 | ≥ 6 species | proteasome (prosome, macropain) assembly chaperone 2                                              |
| Tmem41b       | 1.60 | ≥ 6 species | transmembrane protein 41B                                                                         |
| Golt1b        | 1.59 | 5 species   | golgi transport 1 homolog B (S. cerevisiae)                                                       |
| Mef2c         | 1.59 | 4 species   | myocyte enhancer factor 2C                                                                        |
| 1810034K20Rik | 1.59 | 4 species   | magnesium-dependent phosphatase 1                                                                 |
| Smarca1       | 1.59 | 4 species   | SWI/SNF related, matrix associated, actin dependent regulator of chromatin, subfamily e, member 1 |
| Sla           | 1.59 | 4 species   | Src-like-adaptor                                                                                  |
| Gna13         | 1.59 | 4 species   | guanine nucleotide binding protein (G protein), alpha 13                                          |
| Stat3         | 1.59 | 4 species   | signal transducer and activator of transcription 3 (acute-phase response factor)                  |
| 2610204M08Rik | 1.59 | ≥ 6 species | inverted formin, FH2 and WH2 domain containing                                                    |
| Pi4kb         | 1.58 | 4 species   | phosphatidylinositol 4-kinase, catalytic, beta                                                    |
| H2afb3        | 1.58 | 4 species   | H2A histone family, member B3                                                                     |
| Sox13         | 1.58 | 4 species   | SRY (sex determining region Y)-box 13                                                             |
| Flot1         | 1.58 | ≥ 6 species | flotillin 1                                                                                       |
| Baz1a         | 1.58 | 4 species   | bromodomain adjacent to zinc finger domain, 1A                                                    |
| Hs3st1        | 1.58 | 4 species   | heparan sulfate (glucosamine) 3-O-sulfotransferase 1                                              |
| Nek6          | 1.58 | 4 species   | NIMA (never in mitosis gene a)-related kinase 6                                                   |



|               |      |             |                                                                                                                                                                                     |
|---------------|------|-------------|-------------------------------------------------------------------------------------------------------------------------------------------------------------------------------------|
| Carhsp1       | 1.58 | 4 species   | calcium regulated heat stable protein 1, 24kDa                                                                                                                                      |
| Sh3pxd2b      | 1.58 | 4 species   | SH3 and PX domains 2B                                                                                                                                                               |
| Syt12         | 1.58 | 4 species   | synaptotagmin-like 2                                                                                                                                                                |
| Tubb5         | 1.58 | ≥ 6 species | tubulin, beta                                                                                                                                                                       |
| Gpt2          | 1.57 | 4 species   | glutamic pyruvate transaminase (alanine aminotransferase) 2                                                                                                                         |
| Nans          | 1.57 | 4 species   | N-acetylneuraminic acid synthase (sialic acid synthase)                                                                                                                             |
| Rin1          | 1.57 | 4 species   | Ras and Rab interactor 1                                                                                                                                                            |
| Adamts9       | 1.57 | 4 species   | ADAM metallopeptidase with thrombospondin type 1 motif, 9                                                                                                                           |
| Fat1          | 1.57 | 4 species   | FAT tumor suppressor homolog 1 (Drosophila)                                                                                                                                         |
| Rap2b         | 1.57 | 5 species   | RAP2B, member of RAS oncogene family                                                                                                                                                |
| Dusp7         | 1.57 | 4 species   | similar to dual specificity phosphatase 7                                                                                                                                           |
| Nfkbid        | 1.57 | 4 species   | T-cell activation NFkB-like protein                                                                                                                                                 |
| Zfp3611       | 1.57 | 4 species   | zinc finger protein 36, C3H type-like 1                                                                                                                                             |
| Ppfbp1        | 1.57 | 4 species   | PTPRF interacting protein, binding protein 1 (liprin beta 1)                                                                                                                        |
| Pdcd6ip       | 1.56 | 4 species   | programmed cell death 6 interacting protein                                                                                                                                         |
| Xpo1          | 1.56 | ≥ 6 species | exportin 1 (CRM1 homolog, yeast)                                                                                                                                                    |
| Ciapin1       | 1.56 | 4 species   | cytokine induced apoptosis inhibitor 1                                                                                                                                              |
| Scamp2        | 1.56 | 4 species   | secretory carrier membrane protein 2                                                                                                                                                |
| Qpctl         | 1.56 | 4 species   | glutaminyI-peptide cyclotransferase-like                                                                                                                                            |
| Rbm14         | 1.56 | 4 species   | RNA binding motif protein 14                                                                                                                                                        |
| St8sia6       | 1.56 | 4 species   | ST8 alpha-N-acetyl-neuraminide alpha-2,8-sialyltransferase 6                                                                                                                        |
| Paqr3         | 1.56 | 4 species   | progesterone and adiponectin receptor family member III                                                                                                                             |
| Atf4          | 1.56 | 4 species   | activating transcription factor 4 (tax-responsive enhancer element B67)                                                                                                             |
| Slc44a2       | 1.56 | 4 species   | solute carrier family 44, member 2                                                                                                                                                  |
| Usp1          | 1.56 | 4 species   | ubiquitin specific peptidase 1                                                                                                                                                      |
| Klf2          | 1.55 | 4 species   | Kruppel-like factor 2 (lung)                                                                                                                                                        |
| Tardbp        | 1.55 | 4 species   | TAR DNA binding protein                                                                                                                                                             |
| Coro1a        | 1.55 | 5 species   | coronin, actin binding protein, 1A                                                                                                                                                  |
| Hspa13        | 1.55 | 5 species   | stress 70 protein chaperone, microsome-associated, 60kDa                                                                                                                            |
| Wfdc2         | 1.55 | 4 species   | WAP four-disulfide core domain 2                                                                                                                                                    |
| Lars          | 1.55 | 4 species   | leucyl-tRNA synthetase                                                                                                                                                              |
| Brca2         | 1.55 | 4 species   | breast cancer 2, early onset                                                                                                                                                        |
| Ifi30         | 1.55 | 4 species   | interferon, gamma-inducible protein 30                                                                                                                                              |
| 2500003M10Rik | 1.55 | 4 species   | chromosome 1 open reading frame 77                                                                                                                                                  |
| Pfn1          | 1.55 | 5 species   | profilin 1                                                                                                                                                                          |
| Slc7a1        | 1.54 | 4 species   | solute carrier family 7 (cationic amino acid transporter, y+ system), member 1                                                                                                      |
| Lgals1        | 1.54 | 4 species   | lectin, galactoside-binding, soluble, 1 (galectin 1)                                                                                                                                |
| Otub1         | 1.54 | 4 species   | OTU domain, ubiquitin aldehyde binding 1                                                                                                                                            |
| Mlx           | 1.54 | ≥ 6 species | MAX-like protein X                                                                                                                                                                  |
| Tax1bp3       | 1.54 | 4 species   | ribosomal protein L13                                                                                                                                                               |
| Dnajb1        | 1.54 | 4 species   | DnaJ (Hsp40) homolog, subfamily B, member 1                                                                                                                                         |
| Spns2         | 1.54 | 4 species   | spinster homolog 2 (Drosophila)                                                                                                                                                     |
| Celsr1        | 1.54 | 4 species   | cadherin, EGF LAG seven-pass G-type receptor 1 (flamingo homolog, Drosophila)                                                                                                       |
| Tuba1b        | 1.54 | 4 species   | tubulin, alpha 1b                                                                                                                                                                   |
| Rab2b         | 1.54 | 4 species   | RAB2B, member RAS oncogene family                                                                                                                                                   |
| Adfp          | 1.54 | 4 species   | adipose differentiation-related protein                                                                                                                                             |
| Serp1         | 1.54 | 4 species   | stress-associated endoplasmic reticulum protein 1                                                                                                                                   |
| Tmem168       | 1.54 | 4 species   | transmembrane protein 168                                                                                                                                                           |
| Tnks2         | 1.54 | 4 species   | tankyrase, TRF1-interacting ankyrin-related ADP-ribose polymerase 2                                                                                                                 |
| Jak2          | 1.54 | 4 species   | Janus kinase 2 (a protein tyrosine kinase)                                                                                                                                          |
| Pcdh1         | 1.54 | 5 species   | protocadherin 1                                                                                                                                                                     |
| Myh9          | 1.54 | 4 species   | myosin, heavy chain 9, non-muscle                                                                                                                                                   |
| Col3a1        | 1.53 | 4 species   | collagen, type III, alpha 1 (Ehlers-Danlos syndrome type IV, autosomal dominant)<br>platelet-derived growth factor beta polypeptide (simian sarcoma viral (v-sis) oncogene homolog) |
| Pdgb          | 1.53 | 4 species   | complement component 1. q subcomponent, C chain                                                                                                                                     |
| C1qc          | 1.53 | 4 species   | N-acetylglucosaminidase, alpha- (Sanfilippo disease IIIB)                                                                                                                           |
| Naglu         | 1.53 | 4 species   | basal cell adhesion molecule (Lutheran blood group)                                                                                                                                 |
| Bcam          | 1.53 | 4 species   | transformer-2 alpha                                                                                                                                                                 |
| Tra2a         | 1.53 | ≥ 6 species | protein disulfide isomerase family A, member 5                                                                                                                                      |
| Pdia5         | 1.53 | 4 species   | ATP-binding cassette, sub-family F (GCN20), member 1                                                                                                                                |
| Abcf1         | 1.53 | 5 species   | EGF-containing fibulin-like extracellular matrix protein 2                                                                                                                          |
| Efemp2        | 1.53 | 4 species   | chloride intracellular channel 1                                                                                                                                                    |
| Clic1         | 1.52 | 4 species   | DEAD (Asp-Glu-Ala-Asp) box polypeptide 39                                                                                                                                           |
| Ddx39         | 1.52 | 4 species   | basic leucine zipper and W2 domains 1                                                                                                                                               |
| Bzw1          | 1.52 | 5 species   | CDK2-associated protein 2                                                                                                                                                           |
| Cdk2ap2       | 1.52 | 4 species   | prefoldin subunit 2                                                                                                                                                                 |
| Pfdn2         | 1.52 | 5 species   | myo-inositol 1-phosphate synthase A1                                                                                                                                                |
| Isyna1        | 1.52 | ≥ 6 species | solute carrier family 6 (neurotransmitter transporter, creatine), member 8                                                                                                          |
| Slc6a8        | 1.52 | 5 species   | elastin microfibril interfacer 1                                                                                                                                                    |
| Emilin1       | 1.52 | 4 species   | CD53 molecule                                                                                                                                                                       |
| Cd53          | 1.52 | 4 species   | TSC22 domain family, member 1                                                                                                                                                       |
| Tsc22d1       | 1.52 | 4 species   | chromosome 1 open reading frame 75                                                                                                                                                  |
| Tmem206       | 1.52 | 4 species   | CTTNBP2 N-terminal like                                                                                                                                                             |
| Cttb2n1       | 1.52 | 4 species   | docking protein 3                                                                                                                                                                   |
| Dok3          | 1.52 | 4 species   |                                                                                                                                                                                     |

|               |      |             |                                                                                                     |
|---------------|------|-------------|-----------------------------------------------------------------------------------------------------|
| Rfc4          | 1.52 | 4 species   | replication factor C (activator 1) 4, 37kDa                                                         |
| Amd1          | 1.52 | ≥ 6 species | adenosylmethionine decarboxylase 1                                                                  |
| Stip1         | 1.52 | 4 species   | stress-induced-phosphoprotein 1 (Hsp70/Hsp90-organizing protein)                                    |
| Surf4         | 1.51 | 5 species   | surfeit 4                                                                                           |
| EG545124      | 1.51 | 4 species   | thymine-DNA glycosylase                                                                             |
| Itga6         | 1.51 | 4 species   | integrin, alpha 6                                                                                   |
| Usp6nl        | 1.51 | 4 species   | ---                                                                                                 |
| Cebpγ         | 1.51 | 5 species   | CCAAT/enhancer binding protein (C/EBP), gamma                                                       |
| Txn1l         | 1.50 | 5 species   | thioredoxin-like 1                                                                                  |
| Rap1b         | 1.50 | 4 species   | RAP1B, member of RAS oncogene family                                                                |
| Cbfb          | 1.50 | 4 species   | core-binding factor, beta subunit                                                                   |
| Pitpna        | 1.50 | 4 species   | phosphatidylinositol transfer protein, alpha                                                        |
| Hoxb9         | 1.50 | 5 species   | homeobox B9                                                                                         |
| Sdhc          | 1.50 | 4 species   | succinate dehydrogenase complex, subunit C, integral membrane protein, 15kDa                        |
| Cgrrf1        | 0.67 | 4 species   | cell growth regulator with ring finger domain 1                                                     |
| Ube4b         | 0.67 | 4 species   | ubiquitination factor E4B (UFD2 homolog, yeast)                                                     |
| Tceb3         | 0.66 | 5 species   | transcription elongation factor B (SIII), polypeptide 3 (110kDa, elongin A)                         |
| Mansc1        | 0.66 | 4 species   | MANSC domain containing 1                                                                           |
| 1700025K23Rik | 0.66 | 5 species   | hypothetical protein LOC619208                                                                      |
| Slc26a11      | 0.66 | 5 species   | solute carrier family 26, member 11                                                                 |
| Dock9         | 0.66 | 5 species   | dedicator of cytokinesis 9                                                                          |
| Tenc1         | 0.66 | 5 species   | tensin like C1 domain containing phosphatase (tensin 2)                                             |
| Ccnd2         | 0.66 | 5 species   | cyclin D2                                                                                           |
| Sdf4          | 0.66 | 5 species   | stromal cell derived factor 4                                                                       |
| Vars          | 0.66 | 4 species   | valyl-tRNA synthetase                                                                               |
| Dtd1          | 0.65 | 4 species   | D-tyrosyl-tRNA deacylase 1 homolog (S. cerevisiae)                                                  |
| Ggps1         | 0.65 | 4 species   | geranylgeranyl diphosphate synthase 1                                                               |
| Tns1          | 0.65 | 4 species   | tensin 1                                                                                            |
| Frag1         | 0.65 | 4 species   | FGF receptor activating protein 1                                                                   |
| Tmem205       | 0.65 | 4 species   | MBC3205                                                                                             |
| Vamp3         | 0.65 | 5 species   | vesicle-associated membrane protein 3 (cellubrevin)                                                 |
| 1810009O10Rik | 0.65 | 4 species   | family with sequence similarity 58, member A                                                        |
| Esrra         | 0.65 | 4 species   | estrogen-related receptor alpha                                                                     |
| Vill          | 0.65 | 5 species   | villin-like                                                                                         |
| Igsf9         | 0.65 | 4 species   | immunoglobulin superfamily, member 9                                                                |
| Scamp5        | 0.65 | 4 species   | secretory carrier membrane protein 5                                                                |
| Tfpt          | 0.64 | 4 species   | TCF3 (E2A) fusion partner (in childhood Leukemia)                                                   |
| Angpt1        | 0.64 | 5 species   | angiopoietin 1                                                                                      |
| Slc9a3r2      | 0.64 | 4 species   | solute carrier family 9 (sodium/hydrogen exchanger), member 3 regulator 2                           |
| Ppcdc         | 0.64 | 4 species   | phosphopantothenoylcysteine decarboxylase                                                           |
| Gpr19         | 0.64 | 4 species   | G protein-coupled receptor 19                                                                       |
| Ick           | 0.63 | 4 species   | intestinal cell (MAK-like) kinase                                                                   |
| Traf6         | 0.63 | 5 species   | TNF receptor-associated factor 6                                                                    |
| Kctd2         | 0.63 | 4 species   | potassium channel tetramerisation domain containing 2                                               |
| Rasl11b       | 0.63 | 4 species   | RAS-like, family 11, member B                                                                       |
| Aebp2         | 0.63 | 4 species   | AE binding protein 2                                                                                |
| Fkbp3         | 0.63 | 4 species   | FK506 binding protein 3, 25kDa                                                                      |
| Tiparp        | 0.63 | 5 species   | TCDD-inducible poly(ADP-ribose) polymerase                                                          |
| Itpkb         | 0.63 | 4 species   | inositol 1,4,5-trisphosphate 3-kinase B                                                             |
| Fam132a       | 0.63 | 4 species   | family with sequence similarity 132, member A                                                       |
| Dnaja4        | 0.63 | 5 species   | DnaJ (Hsp40) homolog, subfamily A, member 4                                                         |
| Nme7          | 0.63 | 4 species   | non-metastatic cells 7, protein expressed in (nucleoside-diphosphate kinase)                        |
| Dhdh          | 0.63 | 4 species   | dihydrodiol dehydrogenase (dimeric)                                                                 |
| Pcbd1         | 0.63 | 4 species   | pterin-4 alpha-carbinolamine dehydratase/dimerization cofactor of hepatocyte nuclear factor 1 alpha |
| Fgfr1op2      | 0.63 | 4 species   | FGFR1 oncogene partner 2                                                                            |
| Gabbr1        | 0.63 | 4 species   | gamma-aminobutyric acid (GABA) B receptor, 1                                                        |
| Stard8        | 0.63 | 4 species   | STAR-related lipid transfer (START) domain containing 8                                             |
| Ppargc1a      | 0.63 | 4 species   | peroxisome proliferator-activated receptor gamma, coactivator 1 alpha                               |
| Scrn3         | 0.62 | 4 species   | secernin 3                                                                                          |
| 1110001A16Rik | 0.62 | 5 species   | RIKEN cDNA 1110001A16 gene                                                                          |
| 1810048J11Rik | 0.62 | 5 species   | chromosome 14 open reading frame 135                                                                |
| Dbp           | 0.62 | 5 species   | D site of albumin promoter (albumin D-box) binding protein                                          |
| Usp2          | 0.62 | 4 species   | ubiquitin specific peptidase 2                                                                      |
| Hmgn3         | 0.62 | 4 species   | high mobility group nucleosomal binding domain 3                                                    |
| Ehd3          | 0.62 | 5 species   | EH-domain containing 3                                                                              |
| Atp11b        | 0.62 | 4 species   | ATPase, class VI, type 11B                                                                          |
| Abhd10        | 0.62 | 4 species   | abhydrolase domain containing 10                                                                    |
| Ypel3         | 0.62 | 4 species   | yippee-like 3 (Drosophila)                                                                          |
| Slc16a2       | 0.61 | 4 species   | solute carrier family 16, member 2 (monocarboxylic acid transporter 8)                              |
| Abcc5         | 0.61 | 4 species   | ATP-binding cassette, sub-family C (CFTR/MRP), member 5                                             |
| Esam          | 0.61 | 5 species   | endothelial cell adhesion molecule                                                                  |
| Slc7a8        | 0.61 | 4 species   | solute carrier family 7 (cationic amino acid transporter, y+ system), member 8                      |
| Zfp579        | 0.61 | 5 species   | zinc finger protein 579                                                                             |
| Tmem180       | 0.61 | ≥ 6 species | transmembrane protein 180                                                                           |

|                    |      |             |                                                                                                   |
|--------------------|------|-------------|---------------------------------------------------------------------------------------------------|
| Pctp               | 0.60 | 4 species   | phosphatidylcholine transfer protein                                                              |
| Klf7               | 0.60 | ≥ 6 species | Kruppel-like factor 7 (ubiquitous)                                                                |
| Gm166              | 0.60 | 4 species   | hypothetical protein LOC90835                                                                     |
| Pgrmc2             | 0.60 | 4 species   | progesterone receptor membrane component 2                                                        |
| Aff4               | 0.60 | 4 species   | AF4/FMR2 family, member 4                                                                         |
| Prelp              | 0.59 | 4 species   | proline/arginine-rich end leucine-rich repeat protein                                             |
| Hist1h2bc          | 0.59 | 5 species   | histone cluster 1. H2bf                                                                           |
| Vps37a             | 0.59 | 5 species   | vacuolar protein sorting 37 homolog A ( <i>S. cerevisiae</i> )                                    |
| Fgd5               | 0.59 | 4 species   | FYVE, RhoGEF and PH domain containing 5                                                           |
| Notch4             | 0.59 | 4 species   | Notch homolog 4 ( <i>Drosophila</i> )                                                             |
| Scly               | 0.59 | 4 species   | selenocysteine lyase                                                                              |
| Cct4               | 0.59 | 4 species   | chaperonin containing TCP1. subunit 4 (delta)                                                     |
| OTTMUSG00000009332 | 0.59 | 4 species   | zinc finger, MYM-type 6                                                                           |
| Shank2             | 0.59 | 4 species   | ---                                                                                               |
| Usp36              | 0.58 | 4 species   | ubiquitin specific peptidase 36                                                                   |
| Cnot3              | 0.58 | 4 species   | CCR4-NOT transcription complex, subunit 3                                                         |
| Cldn15             | 0.58 | 4 species   | claudin 15                                                                                        |
| Irak4              | 0.58 | 4 species   | interleukin-1 receptor-associated kinase 4                                                        |
| Fahd2a             | 0.58 | 4 species   | fumarylacetoacetate hydrolase domain containing 2A                                                |
| Ccdc91             | 0.58 | 4 species   | coiled-coil domain containing 91                                                                  |
| Dnajc28            | 0.58 | 4 species   | chromosome 21 open reading frame 55                                                               |
| Vps37c             | 0.58 | 4 species   | vacuolar protein sorting 37 homolog C ( <i>S. cerevisiae</i> )                                    |
| Fbx116             | 0.57 | ≥ 6 species | F-box and leucine-rich repeat protein 16                                                          |
| Cpox               | 0.57 | 4 species   | coproporphyrinogen oxidase                                                                        |
| Hdgfrp3            | 0.57 | 4 species   | hepatoma-derived growth factor, related protein 3                                                 |
| Wnk4               | 0.57 | ≥ 6 species | WNK lysine deficient protein kinase 4                                                             |
| Thra               | 0.57 | 4 species   | thyroid hormone receptor, alpha (erythroblastic leukemia viral (v-erb-a) oncogene homolog, avian) |
| Prkar2b            | 0.57 | 4 species   | protein kinase, cAMP-dependent, regulatory, type II, beta                                         |
| Spint1             | 0.57 | 4 species   | serine peptidase inhibitor, Kunitz type 1                                                         |
| 4430402I18Rik      | 0.57 | 4 species   | chromosome 9 open reading frame 68                                                                |
| Pcx                | 0.56 | 4 species   | pyruvate carboxylase                                                                              |
| Ckb                | 0.56 | 4 species   | creatine kinase, brain                                                                            |
| Slc5a2             | 0.55 | 4 species   | solute carrier family 5 (sodium/glucose cotransporter), member 2                                  |
| Ech1               | 0.55 | 4 species   | enoyl Coenzyme A hydratase 1, peroxisomal                                                         |
| Apbb1              | 0.55 | 4 species   | amyloid beta (A4) precursor protein-binding, family B, member 1 (Fe65)                            |
| Srprb              | 0.55 | 5 species   | signal recognition particle receptor, B subunit                                                   |
| Bcar3              | 0.55 | 5 species   | breast cancer anti-estrogen resistance 3                                                          |
| Pts                | 0.55 | 4 species   | 6-pyruvoyltetrahydropterin synthase                                                               |
| Nox4               | 0.54 | 4 species   | NADPH oxidase 4                                                                                   |
| 1810019J16Rik      | 0.54 | 5 species   | chromosome 1 open reading frame 172                                                               |
| Maf                | 0.54 | 5 species   | v-maf musculoaponeurotic fibrosarcoma oncogene homolog (avian)                                    |
| Lsm4               | 0.54 | 4 species   | LSM4 homolog, U6 small nuclear RNA associated ( <i>S. cerevisiae</i> )                            |
| Gcnt1              | 0.54 | 4 species   | glucosaminyl (N-acetyl) transferase 1. core 2 (beta-1.6-N-acetylglucosaminyltransferase)          |
| Slc27a1            | 0.54 | 4 species   | solute carrier family 27 (fatty acid transporter), member 1                                       |
| Khk                | 0.54 | 4 species   | ketoheksokinase (fructokinase)                                                                    |
| Ell3               | 0.54 | 5 species   | elongation factor RNA polymerase II-like 3                                                        |
| Letm2              | 0.53 | 4 species   | leucine zipper-EF-hand containing transmembrane protein 2                                         |
| Fry                | 0.53 | 4 species   | furry homolog ( <i>Drosophila</i> )                                                               |
| Tmc7               | 0.53 | 4 species   | transmembrane channel-like 7                                                                      |
| Car14              | 0.53 | 4 species   | carbonic anhydrase XIV                                                                            |
| Slc5a9             | 0.53 | 4 species   | solute carrier family 5 (sodium/glucose cotransporter), member 9                                  |
| Fabp3              | 0.53 | 4 species   | fatty acid binding protein 3, muscle and heart (mammary-derived growth inhibitor)                 |
| Htatsf1            | 0.52 | 4 species   | HIV-1 Tat specific factor 1                                                                       |
| Epb4.111           | 0.52 | 4 species   | erythrocyte membrane protein band 4.1-like 1                                                      |
| D630042F21Rik      | 0.52 | 4 species   | chromosome 12 open reading frame 59                                                               |
| Lhx1               | 0.52 | 4 species   | LIM homeobox 1                                                                                    |
| Cdk11              | 0.52 | 4 species   | cyclin-dependent kinase-like 1 (CDC2-related kinase)                                              |
| Pklr               | 0.51 | 5 species   | pyruvate kinase, liver and RBC                                                                    |
| Cobl1              | 0.51 | 4 species   | COBL-like 1                                                                                       |
| Scn4b              | 0.51 | 4 species   | sodium channel, voltage-gated, type IV, beta                                                      |
| BC020535           | 0.51 | ≥ 6 species | chromosome 20 open reading frame 160                                                              |
| 1700022C21Rik      | 0.51 | 4 species   | chromosome 6 open reading frame 12                                                                |
| Rbm47              | 0.51 | 4 species   | RNA binding motif protein 47                                                                      |
| Meis2              | 0.51 | 5 species   | Meis homeobox 2                                                                                   |
| Nit1               | 0.51 | 5 species   | nitrilase 1                                                                                       |
| Enpp2              | 0.51 | 4 species   | ectonucleotide pyrophosphatase/phosphodiesterase 2 (autotaxin)                                    |
| 2010111I01Rik      | 0.51 | 4 species   | chromosome 9 open reading frame 3                                                                 |
| Tmem116            | 0.51 | 4 species   | transmembrane protein 116                                                                         |
| 1110018J18Rik      | 0.51 | 4 species   | chromosome 9 open reading frame 21                                                                |
| Cd200              | 0.51 | 4 species   | CD200 molecule                                                                                    |
| Tmem88             | 0.50 | 5 species   | transmembrane protein 88                                                                          |
| Spnb3              | 0.50 | 4 species   | spectrin, beta, non-erythrocytic 2                                                                |
| Sim1               | 0.50 | 4 species   | single-minded homolog 1 ( <i>Drosophila</i> )                                                     |
| Dctn3              | 0.49 | 4 species   | dynactin 3 (p22)                                                                                  |

|               |      |             |                                                                                                               |
|---------------|------|-------------|---------------------------------------------------------------------------------------------------------------|
| Sh3bgrl2      | 0.49 | 5 species   | SH3 domain binding glutamic acid-rich protein like 2                                                          |
| Cetn4         | 0.49 | 5 species   | centrin 4                                                                                                     |
| A230067G21Rik | 0.48 | 4 species   | RIKEN cDNA A230067G21 gene                                                                                    |
| 1110005A03Rik | 0.48 | 5 species   | hypothetical protein LOC124512                                                                                |
| Ras112        | 0.48 | 4 species   | RAS-like, family 12                                                                                           |
| Phf21a        | 0.48 | 4 species   | PHD finger protein 21A                                                                                        |
| Gadd45gip1    | 0.48 | 5 species   | growth arrest and DNA-damage-inducible, gamma interacting protein 1                                           |
| Gpr116        | 0.47 | 4 species   | G protein-coupled receptor 116                                                                                |
| Slc46a1       | 0.47 | 4 species   | solute carrier family 46 (folate transporter), member 1                                                       |
|               |      |             | ATPase, H <sup>+</sup> transporting, lysosomal 56/58kDa, V1 subunit B1 (Renal tubular acidosis with deafness) |
| Atp6v1b1      | 0.47 | 4 species   | with deafness)                                                                                                |
| Syt17         | 0.46 | 4 species   | ---                                                                                                           |
| Aldoc         | 0.46 | 4 species   | aldolase C, fructose-bisphosphate                                                                             |
| Ndufaf1       | 0.46 | 4 species   | NADH dehydrogenase (ubiquinone) 1 alpha subcomplex, assembly factor 1                                         |
| Kcnj1         | 0.46 | 4 species   | potassium inwardly-rectifying channel, subfamily J, member 1                                                  |
| Arsg          | 0.46 | 4 species   | arylsulfatase G                                                                                               |
| Dixdc1        | 0.45 | 4 species   | DIX domain containing 1                                                                                       |
| Egfl6         | 0.45 | 4 species   | EGF-like-domain, multiple 6                                                                                   |
| Msi2          | 0.44 | 4 species   | musashi homolog 2 (Drosophila)                                                                                |
| C030014I23Rik | 0.44 | 5 species   | RIKEN cDNA C030014I23 gene                                                                                    |
| Actr1a        | 0.43 | 4 species   | ---                                                                                                           |
| Ankrd29       | 0.42 | 4 species   | ankyrin repeat domain 29                                                                                      |
| Srr           | 0.42 | 4 species   | serine racemase                                                                                               |
| Thy1          | 0.42 | 4 species   | Thy-1 cell surface antigen                                                                                    |
| Tm2d2         | 0.41 | 4 species   | TM2 domain containing 2                                                                                       |
| Ncoa7         | 0.41 | 4 species   | nuclear receptor coactivator 7                                                                                |
| Slc14a1       | 0.41 | 4 species   | solute carrier family 14 (urea transporter), member 1 (Kidd blood group)                                      |
| 2700081O15Rik | 0.40 | 4 species   | hypothetical protein MGC3032                                                                                  |
| Fxyd2         | 0.40 | 4 species   | FXD domain containing ion transport regulator 2                                                               |
| Per3          | 0.40 | 4 species   | period homolog 3 (Drosophila)                                                                                 |
| Trove2        | 0.40 | 5 species   | TROVE domain family, member 2                                                                                 |
| Pclo          | 0.40 | 4 species   | piccolo (presynaptic cytomatrix protein)                                                                      |
| Prox1         | 0.40 | ≥ 6 species | prospero homeobox 1                                                                                           |
| Mpped2        | 0.39 | 4 species   | metallophosphoesterase domain containing 2                                                                    |
| Esrb          | 0.39 | 4 species   | estrogen-related receptor beta                                                                                |
| 2210021J22Rik | 0.39 | 4 species   | similar to RIKEN cDNA 2210021J22                                                                              |
| Epdr1         | 0.39 | 4 species   | ependymin related protein 1 (zebrafish)                                                                       |
| Upp2          | 0.39 | 4 species   | uridine phosphorylase 2                                                                                       |
| Trim63        | 0.39 | 4 species   | tripartite motif-containing 63                                                                                |
| Mapkapk3      | 0.38 | ≥ 6 species | mitogen-activated protein kinase-activated protein kinase 3                                                   |
| D3Bwg0562e    | 0.38 | 4 species   | plasticity related gene 1                                                                                     |
| Gcom1         | 0.37 | 4 species   | GRINL1A combined protein                                                                                      |
| Iptr2         | 0.37 | 4 species   | inositol 1,4,5-triphosphate receptor, type 2                                                                  |
| Ppox          | 0.36 | 5 species   | protoporphyrinogen oxidase                                                                                    |
| Habp4         | 0.36 | 4 species   | hyaluronan binding protein 4                                                                                  |
| Gtpbp2        | 0.35 | 5 species   | GTP binding protein 2                                                                                         |
| Prdm5         | 0.35 | 4 species   | PR domain containing 5                                                                                        |
| Pcnp          | 0.35 | 5 species   | PEST proteolytic signal containing nuclear protein                                                            |
| Car9          | 0.34 | 4 species   | carbonic anhydrase IX                                                                                         |
| Klhdc5        | 0.34 | ≥ 6 species | kelch domain containing 5                                                                                     |
| Glo1          | 0.34 | 4 species   | glyoxalase I                                                                                                  |
| Abhd14b       | 0.33 | 4 species   | abhydrolase domain containing 14B                                                                             |
| 2210020M01Rik | 0.32 | 4 species   | RIKEN cDNA 2210020M01 gene                                                                                    |
| Sfrp1         | 0.30 | 4 species   | secreted frizzled-related protein 1                                                                           |
|               |      |             | solute carrier family 4, anion exchanger, member 1 (erythrocyte membrane protein band 3. Diego blood group)   |
| Slc4a1        | 0.28 | 4 species   | Diego blood group)                                                                                            |
| Slc6a19       | 0.28 | ≥ 6 species | solute carrier family 6 (neutral amino acid transporter), member 19                                           |
| Rpl17         | 0.26 | 5 species   | ribosomal protein L17                                                                                         |
| Fgf1          | 0.25 | 4 species   | fibroblast growth factor 1 (acidic)                                                                           |
| Hfe           | 0.24 | 5 species   | hemochromatosis                                                                                               |
| EG620009      | 0.23 | 4 species   | pyruvate dehydrogenase (lipoamide) beta                                                                       |
| Zyg11b        | 0.20 | 5 species   | zyg-11 homolog B (C. elegans)                                                                                 |
| Slc35a5       | 0.19 | 5 species   | solute carrier family 35, member A5                                                                           |
| Pi4k2a        | 0.19 | ≥ 6 species | phosphatidylinositol 4-kinase type 2 alpha                                                                    |
| Shisa3        | 0.18 | 4 species   | hypothetical protein BC012029                                                                                 |
| Slc16a5       | 0.18 | 4 species   | solute carrier family 16, member 5 (monocarboxylic acid transporter 6)                                        |
| Pex19         | 0.12 | 4 species   | peroxisomal biogenesis factor 19                                                                              |
| Prdx2         | 0.06 | ≥ 6 species | peroxiredoxin 2                                                                                               |

**Supplemental Table 2:** list of the primers used for quantitative RT-PCR experiments.

| Genes name                                                | Symbol  | Forward primer           | Reverse primer             |
|-----------------------------------------------------------|---------|--------------------------|----------------------------|
| Actin, alpha 2, smooth muscle, aorta                      | Acta2   | CATGCGTCTGGACTTGGCTG     | GACAATCTCACGCTCGGCAGTAG    |
| Adrenomedullin                                            | Adm     | CGAAAGAAGTGAATAAGTGGG    | GTTTCATGCTCTGGCGGTAGCG     |
| Angiotensinogen                                           | Agt     | CGTGACGTGCGTGCCCCTAG     | GCAGAGTCAGGCGGATGGCC       |
| Angiopoietin 1                                            | Agpt1   | GGGGGAGGTTGGACAGTAA      | CATCAGCTCAATCCTCAGC        |
| Aquaporin 2                                               | Aqp2    | TAGCCCTGCTCTCTCCATTGGTTT | AAACTTGCCAGTGACAACCTGCTGG  |
| Autotaxin                                                 | Enpp2   | GTCGGTGTGACAACCTATGTAA   | ATCTGTCTTTGGTGCCTCC        |
| Calbindin 1, 28kDa                                        | Calb1   | TTGGCTCAGTCTTACCCACAGAA  | ATGAAGCCGCTGTGGTCAGTATCA   |
| Collagen, Typ I, alpha 1                                  | Col1a1  | GCCGCAAAGAGTCTACATGTCTAG | TGGCAGATACAGATCAAGCATACC   |
| Collagen, Typ III, alpha 1                                | Col3a1  | GGACCAGCAGGAACTAATGGTAT  | GTTCTCCAGGTGATCCATCTTT     |
| Collagen, Typ IV, alpha 1                                 | Col4a1  | GTCTGGCTTCTGCTGCTCTTC    | CCTTCACGCCATGACAGTCA       |
| Collagen, Typ XII, alpha 1                                | Col12a1 | AGGAGAGCCAGGCCTTCCGG     | GAGAGCCTGGGCTTCCCGGT       |
| Connective tissue growth factor                           | Ctgf    | GCTGACCTGGAGGAAAACATTAA  | TGACAGGCTTGGCGATTTTAG      |
| Cysteine rich protein 61                                  | Cyr61   | GGA TGA ATG GTG CCT TGC  | GTC CAC ATC AGC CCC TTG    |
| Endothelin 1                                              | Edn1    | CTGGAGACCCCGCAGGTCCAA    | AGTCCATACGGTACGACGCGC      |
| Follistatin                                               | Fst     | GGATTAGCCTATGAGGGAAAGTG  | CCTCTGCCAACCTTGAATC        |
| Plasminogen activator, urokinase                          | Plau    | GTGCCGCACACTGCTTCATT     | CGTGCTGGTACGTATCTTCA       |
| Platelet derived growth factor receptor, beta polypeptide | Pdgfb   | GCGCCTGCTGCACAGAGACT     | GCTCTGCTGCTGCCAGGGAC       |
| Ribosomal protein L13                                     | Rpl13   | CTCATCCCTGTTCCCCAGGAA    | GGGTGGCCAGCTTAAGTTCTT      |
| S100 calcium binding protein A4                           | S100a4  | CTTGGTCTGGTCTCAACGGTTA   | TTGCCTGAGTATTTGTGGAAGGT    |
| Secreted frizzled-related protein 1                       | Sfrp1   | CAATACCACGGAAGCCTCTAAG   | CTCGCTTGACAGAGATGTT        |
| Solute Carrier Family 12 Member 1                         | Slc12a1 | CGCCTTTGACTTTGAGATTGGCGT | ACACTCGTTGTCTTTGATTGCGGC   |
| Solute Carrier Family 12 Member 3                         | Slc12a3 | GGGCAAATGCAAGATCCGAGTGTT | TTGATGTCGGAAGGACGTGAACT    |
| Solute Carrier Family 4 Member 1                          | Slc4a1  | AAGAGGTCAAGGAACAGCGGATCA | TACAGGAAGATGCCGAAGAGCACA   |
| Solute Carrier Family 34 Member 1                         | Slc34a1 | GGCTTGTGGTTGCTTCCTTCAACA | GGCTTGTGGTTGCTTCCTTCAACA   |
| Solute Carrier Family 34 Member 3                         | Slc34a3 | ATGGTGGCCTCTAAGTTGCTGACT | TGCTGGTGTGATCGAAGTACCCACAT |
| Suppressor of cytokine signaling 3                        | Socs3   | CCACCCTCCAGCATCTTTGT     | CAGGCAGCTGGGTCACCTTTC      |
| Tissue inhibitor of metalloproteinase 1                   | Timp1   | AGTCCCAGAACCGCAGTGAA     | AAGAAGCTGCAGGCACTGATG      |

|                                    |       |                         |                          |
|------------------------------------|-------|-------------------------|--------------------------|
| Transforming growth factor, beta 2 | Tgfb2 | CACCCAGCGCTACATCGATA    | CACGTCGAAGGAGAGCCATT     |
| Transgelin 2                       | Tgln  | AAGGACGGCACGGTTCTGT     | TGTTAATGCCATAGCGCTCG     |
| Transglutaminase 1                 | Tgm1  | GGGTGCTGGATGCCTGCCTG    | CACTGCCACCCACGCTGAG      |
| Uromodullin                        | Umod  | TCAACAGAAGCGAGACGGTGTCT | AGCACACTCATCCATGTCCTCACA |

---

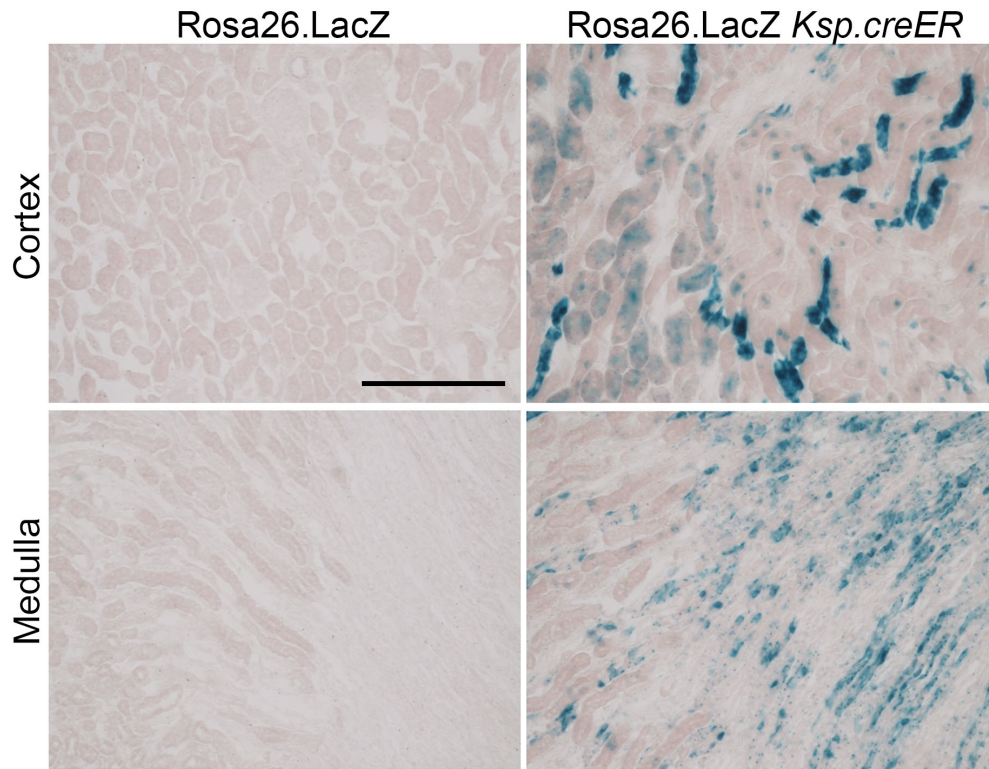

**Supplemental Figure S1: *Ksp.creER<sup>T2</sup>* mice drive inducible cre expression in both proximal and distal tubules.**  $\beta$ -galactosidase staining of kidneys from *Rosa26.LacZ* (n=2) or *Rosa26.LacZ Ksp.creER<sup>T2</sup>* (n=4) mice, 2 weeks after tamoxifen treatment. Scale Bar: 100  $\mu$ m.

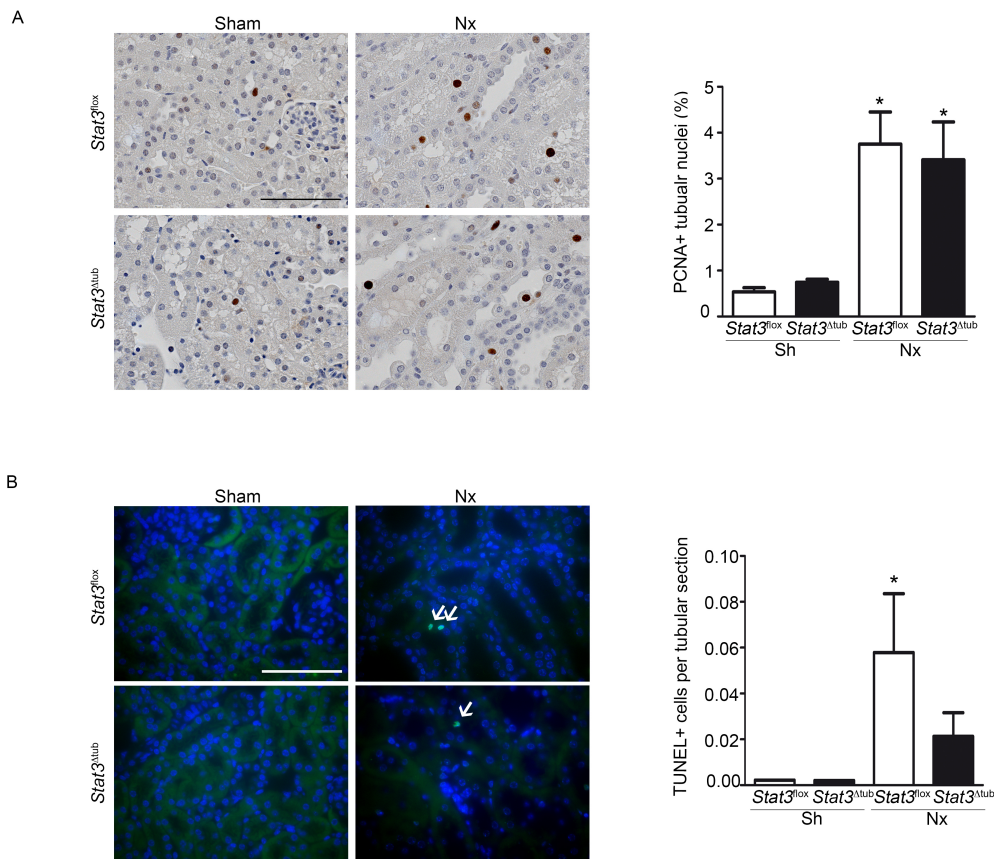

**Supplemental Figure S2: Stat3 deletion does not impact on tubular cell proliferation and apoptosis.** (A) PCNA immunostaining (left panels) and quantification (right panel) of PCNA-positive tubular cells in kidney from sham-operated (Sh) *Stat3<sup>fllox</sup>* (n=3) and *Stat3<sup>tub</sup>* (n=4) mice and 75% nephrectomized (Nx) *Stat3<sup>fllox</sup>* (n=9) and *Stat3<sup>tub</sup>* (n=13) mice 90 days after surgery. (B) TUNEL assay and quantification of TUNEL-positive tubular cells in the same animals. Scale Bar: 50  $\mu$ m. Data are means  $\pm$  SEM. ANOVA followed by Tukey-Kramer test. Sh versus Nx mice: \* P < 0.05.



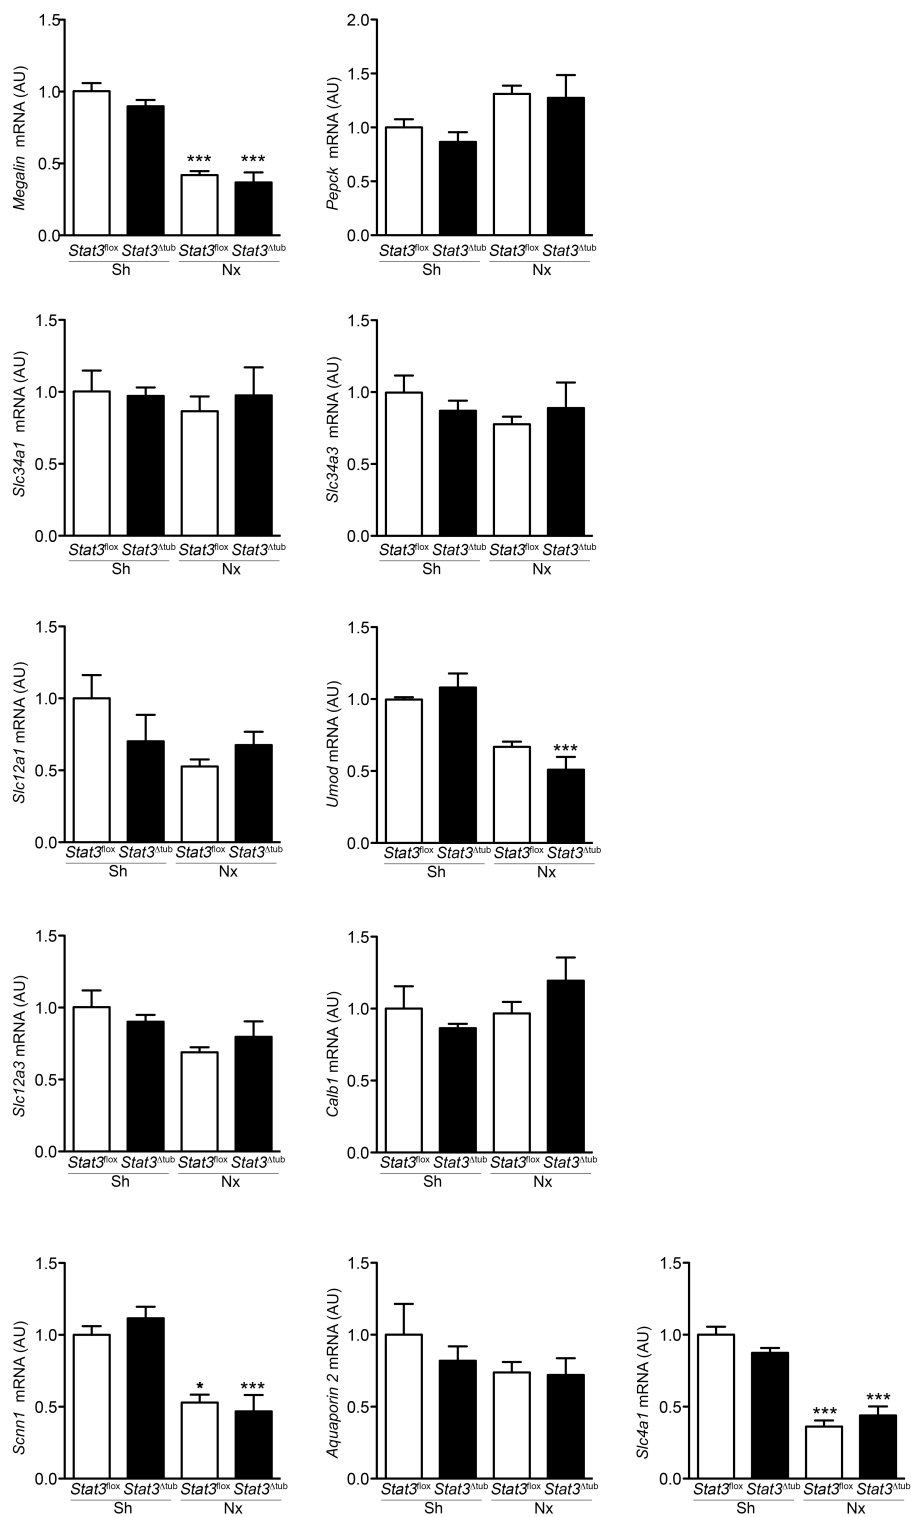

**Supplemental Figure S3: Tubular *Stat3* invalidation does not affect the expression of critical tubular genes.** Quantitative RT-PCR of the indicated genes in sham-operated (Sh) *Stat3*<sup>fllox</sup> (n=3) and *Stat3*<sup>tub</sup> (n=4) mice and 75% nephrectomized (Nx) *Stat3*<sup>fllox</sup> (n=9) and *Stat3*<sup>tub</sup> (n=13) mice 90 days after surgery. All relative expression are normalized to *Rpl13*. Data are means ± SEM. ANOVA followed by Tukey-Kramer test. Sh versus Nx mice: \* P < 0.05, \*\*\* P < 0.001.

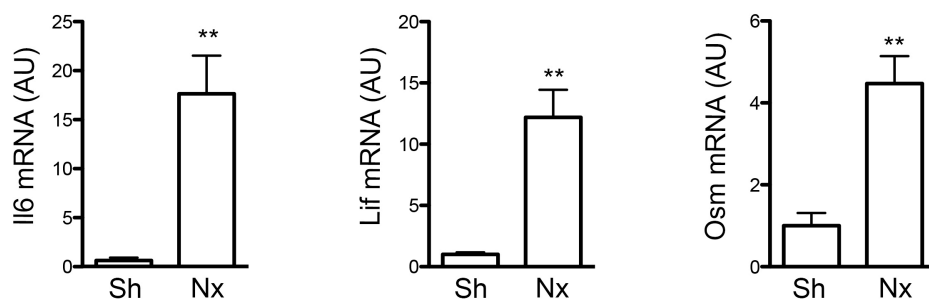

**Supplemental Figure S4: Interleukin 6 (Il6), Leukemia inhibiting factor (Lif) and Oncostatin M (Osm) expression increases after nephron reduction in lesion-prone mice.**

Quantitative RT-PCR of IL-6, Lif, and Osm mRNA content in FVB/N sham operated (Sh; n=4) and 75% nephrectomized (Nx; n=8) mice, 60 days after surgery. All relative expression are normalized to *Rpl13*. Mann Whitney test: Sh *versus* Nx mice: \*\* P < 0.01.
